# Supplementary material
Source: PubMed Central journal article supplement (PMC6779139)
Supplement: NIHMS1521623-supplement-40272_2018_324_MOESM1_ESM.pdf [file NIHMS1521623-supplement-40272_2018_324_MOESM1_ESM.pdf]

# **Neuropathic Pain in Pediatric Oncology: A Clinical Decision Algorithm**

**Doralina L. Anghelescu · Jessica Michala Tesney**

**Division of Anesthesia, Department of Pediatric Medicine, St. Jude Children's Research Hospital, Memphis, TN 38105, USA**

***Pediatric Drugs, 2019***

**Supplementary Material**

**Supplementary Material - Mechanism of Action for Neuropathic Pain Medication Classes and Analgesic Efficacy**

| <b>Medication Class</b>                                                        | <b>Mechanism of Action</b>                                                                                                                                        | <b>NNT [2]</b> | <b>NNH [2]</b> |
|--------------------------------------------------------------------------------|-------------------------------------------------------------------------------------------------------------------------------------------------------------------|----------------|----------------|
| <b><u>Gabapentinoids</u></b>                                                   | Binding to $\alpha 2\delta$ -1 subunit of voltage-gated $\text{Ca}^{2+}$ channels and internalization of $\text{Ca}^{2+}$ channel [1-6]                           | -              | -              |
| gabapentin                                                                     |                                                                                                                                                                   | 6.3            | 25.6           |
| extended release/Enacarbil                                                     |                                                                                                                                                                   | 8.3            | 31.9           |
| pregabalin                                                                     |                                                                                                                                                                   | 7.7            | 13.9           |
| <b><u>TCA</u>s</b><br>(amitriptyline*, desipramine, nortriptyline, imipramine) | Local anesthetic effect: voltage-gated sodium channels block<br>Central sensitization: NMDA receptors block<br>Activation of interneurons that release GABA [1-5] | 3.6            | 13.4           |
| <b><u>SNRIs</u></b><br>(duloxetine, venlafaxine)                               | Inhibition of reuptake of serotonin and noradrenaline [1-5]                                                                                                       | 6.4            | 11.8           |
| <b><u>Tramadol &amp; tapentadol</u></b>                                        | SNRI mechanism and weak mu-opioid agonist [1-5,7]                                                                                                                 | 4.7            | 12.6           |
| <b><u>Strong opioids</u></b><br>(morphine, oxycodone*, hydromorphone)          | Agonist of mu-opioid receptors, results in blocking synaptic communication [1-5]                                                                                  | 4.3            | 11.7           |
| <b><u>Topical/subcutaneous</u></b>                                             | [1-5]                                                                                                                                                             | -              | -              |
| 5% lidocaine patch                                                             | Voltage-gated $\text{Na}^+$ channels block [8]                                                                                                                    | -              | -              |
| 8% capsaicin patch                                                             | TRPV1 agonist, increases intracellular $\text{Ca}^{2+}$ resulting in cellular dysfunction [9]                                                                     | 10.6           | -              |
| botulinum toxin A                                                              | Binds SNARE complex and prevents release of acetylcholine into the neuromuscular junction [10]                                                                    | 1.9            | -              |

\*Medication used to calculate the NNT and NNH for the medication class

Abbreviations: NNT, number needed to treat; NNH, number needed to harm; TCAs, tricyclic antidepressants; NMDA, N-methyl-D-aspartic acid; GABA, gamma-aminobutyric acid; SNRIs, serotonin norepinephrine reuptake inhibitors; TRPV1, transient receptor potential cation channel subfamily V member 1; SNARE, Soluble NSF(N-ethylmaleimide-sensitive factor) Attachment Protein Receptor

**Supplementary Material - Adult Dosing Regimens for Neuropathic Pain Medications**

| <b>Medication Class/Type</b>            | <b>Dose Regimen (Maximum Total Daily)*</b> | <b>Recommended Duration**</b> |
|-----------------------------------------|--------------------------------------------|-------------------------------|
| <b><u>Gabapentinoids</u></b>            |                                            |                               |
| gabapentin                              | 1200 mg TID (3600 mg)                      | 5-10 weeks                    |
| extended released/Enacarbil             | 1200 mg BID (2400 mg)                      |                               |
| pregabalin                              | 200 mg TID or 300 mg BID (600 mg)          | 4 weeks                       |
| <b><u>TCA's</u></b>                     | 25-150 mg QD (150 mg)                      | 8-10 weeks                    |
| <b><u>SNRIs</u></b>                     |                                            |                               |
| duloxetine                              | 30-60 mg BID (120 mg)                      | 4 weeks                       |
| venlafaxine                             | 75-225 mg QD (225 mg)                      | 4-6 weeks                     |
| <b><u>Tramadol &amp; tapentadol</u></b> |                                            |                               |
| tramadol                                | 50-100 mg QID (400 mg)                     | 4 weeks                       |
| tapentadol                              | 50-100 mg Q4-6hrs (600 mg) [11]            |                               |
| <b><u>Topical/subcutaneous</u></b>      |                                            |                               |
| 5% lidocaine patch                      | 1-3 patches for up to 12 hours QD          | 3 weeks                       |
| 8% capsaicin                            | 1-4 patches for 30-60 mins Q3months        |                               |
| botulinum toxin A                       | 50-200 units Q3months                      |                               |

Modified from [1,2]

\*Titration regimens are recommended, starting with lower doses titrated up to the dose cited in the table

\*\*Duration of treatment based on reference [1]

Abbreviations: TCAs, tricyclic antidepressants; SNRIs, serotonin norepinephrine reuptake inhibitors

## References

1. Dworkin RH, O'Connor AB, Audette J, Baron R, Gourlay GK, Haanpaa ML, et al. Recommendations for the pharmacological management of neuropathic pain: an overview and literature update. *Mayo Clin Proc.* 2010;85(3 Suppl):S3–14.
2. Finnerup NB, Attal N, Haroutounian S, McNicol E, Baron R, Dworkin RH, et al. Pharmacotherapy for neuropathic pain in adults: a systematic review and meta-analysis. *Lancet Neurol.* 2015;14(2):162–73.
3. Finnerup NB, Otto M, McQuay HJ, Jensen TS, Sindrup SH. Algorithm for neuropathic pain treatment: an evidence based proposal. *Pain.* 2005;118(3):289–305.
4. Finnerup NB, Attal N. Pharmacotherapy of neuropathic pain: time to rewrite the rulebook? *Pain Manag.* 2016;6(1):1–3.
5. Fornasari D. Pharmacotherapy for neuropathic pain: a review. *Pain Ther.* 2017;6(Suppl 1):25–33.
6. Gee NS, Brown JP, Dissanayake VU, Oford J, Thurlow R, Woodruff GN. The novel anticonvulsant drug, gabapentin (Neurontin), binds to the alpha2delta subunit of a calcium channel. *J Biol Chem.* 1996;271(10):5768–76.
7. Faria J, Barbosa J, Moreira R, Queiros O, Carvalho F, Dinis-Oliveira RJ. Comparative pharmacology and toxicology of tramadol and tapentadol. *Eur J Pain (London, England).* 2018;22(5):827–44.
8. Demant DT, Lund K, Finnerup NB, Vollert J, Maier C, Segerdahl MS, et al. Pain relief with lidocaine 5% patch in localized peripheral neuropathic pain in relation to pain phenotype: a randomised, double-blind, and placebo-controlled, phenotype panel study. *Pain.* 2015;156(11):2234–44.
9. Anand P, Bley K. Topical capsaicin for pain management: therapeutic potential and mechanisms of action of the new high-concentration capsaicin 8% patch. *Br J Anaesth.* 2011;107(4):490–502.
10. Intiso D, Basciani M, Santamato A, Intiso M, Di Rienzo F. Botulinum toxin type A for the treatment of neuropathic pain in neurorehabilitation. *Toxins.* 2015;7(7):2454–80.
11. Pierce DM, Shipstone E. Pharmacology update: tapentadol for neuropathic pain. *The American journal of hospice & palliative care.* 2012 Dec;29(8):663-6.
